# Supplementary material for: Comparative Analysis of the Secretome and Interactome of Trypanosoma cruzi and Trypanosoma rangeli Reveals Species Specific Immune Response Modulating Proteins
Source: Front Immunol. 2020 Aug 27;11:1774. doi: 10.3389/fimmu.2020.01774 (PMC7481403; doi:10.3389/fimmu.2020.01774)
Supplement: Supplementary Table 3 — Manual classification of T. rangeli PSPs according to functional categories. [file Table_3.XLSX]

## Sheet: Trypanosoma rangeli
Protein description
Host-Parasite Interaction
Trypanosoma rangeli
TRSC58_06928	leishmanolysin 3.4.24.36	PFAM: Leishmanolysin, SUPERFAMILY: Metalloproteases ("zincins"), catalytic domain	https://tritrypdb.org/tritrypdb/app/record/gene/TRSC58_06928
Hypothetical
Trypanosoma rangeli
TRSC58_03536	hypothetical protein	SUPERFAMILY: HMG-box	https://tritrypdb.org/tritrypdb/app/record/gene/TRSC58_03536
TRSC58_03541	hypothetical protein	PFAM: Calponin homology (CH) domain, PROSITEPROFILES: Calponin homology (CH) domain profile, SUPERFAMILY: Calponin-homology domain, CH-domain	https://tritrypdb.org/tritrypdb/app/record/gene/TRSC58_03541
TRSC58_03669	hypothetical protein	SUPERFAMILY: ARM repeat	https://tritrypdb.org/tritrypdb/app/record/gene/TRSC58_03669
TRSC58_03746	hypothetical protein	No data available	https://tritrypdb.org/tritrypdb/app/record/gene/TRSC58_03746
TRSC58_03840	hypothetical protein	No data available	https://tritrypdb.org/tritrypdb/app/record/gene/TRSC58_03840
TRSC58_03843	hypothetical protein	PFAM: ATP-grasp domain, PROSITEPROFILES: ATP-grasp fold profile, SUPERFAMILY: Glutathione synthetase ATP-binding domain-like	https://tritrypdb.org/tritrypdb/app/record/gene/TRSC58_03843
TRSC58_03940	hypothetical protein	PFAM: WD domain, G-beta repeat, PROSITEPROFILES: Trp-Asp (WD) repeats circular profile, Trp-Asp (WD) repeats profile, SUPERFAMILY: WD40 repeat-like	https://tritrypdb.org/tritrypdb/app/record/gene/TRSC58_03940
TRSC58_04131	hypothetical protein	No data available	https://tritrypdb.org/tritrypdb/app/record/gene/TRSC58_04131
TRSC58_04206	hypothetical protein	PFAM: Repair protein Rad1/Rec1/Rad17	https://tritrypdb.org/tritrypdb/app/record/gene/TRSC58_04206
TRSC58_04309	hypothetical protein	PFAM: SET domain, PROSITEPROFILES: SET domain profile, SUPERFAMILY: SET domain	https://tritrypdb.org/tritrypdb/app/record/gene/TRSC58_04309
TRSC58_04320	hypothetical protein	No data available	https://tritrypdb.org/tritrypdb/app/record/gene/TRSC58_04320
TR04358	hypothetical protein	No data available	https://www.ncbi.nlm.nih.gov/protein/AGN32990.1?report=genbank&log$=protalign&blast_rank=1&RID=F08661W6015
TRSC58_04448	hypothetical protein	No data available	https://tritrypdb.org/tritrypdb/app/record/gene/TRSC58_04448
TRSC58_04612	hypothetical protein	No data available	https://tritrypdb.org/tritrypdb/app/record/gene/TRSC58_04612
TRSC58_04620	hypothetical protein	PFAM: p25-alpha, SUPERFAMILY: EF-hand	https://tritrypdb.org/tritrypdb/app/record/gene/TRSC58_04620
TRSC58_04691	hypothetical protein	PFAM: WD domain, G-beta repeat, SUPERFAMILY: WD40 repeat-like	https://tritrypdb.org/tritrypdb/app/record/gene/TRSC58_04691
TRSC58_04742	hypothetical protein	No data available	https://tritrypdb.org/tritrypdb/app/record/gene/TRSC58_04742
TRSC58_04772	hypothetical protein	No data available	https://tritrypdb.org/tritrypdb/app/record/gene/TRSC58_04772
TRSC58_04782	hypothetical protein	SUPERFAMILY: ARM repeat	https://tritrypdb.org/tritrypdb/app/record/gene/TRSC58_04782
TRSC58_04787	hypothetical protein	No data available	https://tritrypdb.org/tritrypdb/app/record/gene/TRSC58_04787
TRSC58_04826	hypothetical protein	PFAM:Pentatricopeptide repeat domain	https://tritrypdb.org/tritrypdb/app/record/gene/TRSC58_04826
TRSC58_04889	hypothetical protein	PROSITEPROFILES: Prokaryotic membrane lipoprotein lipid attachment site profile	https://tritrypdb.org/tritrypdb/app/record/gene/TRSC58_04889
TRSC58_04931	hypothetical protein	PFAM: Golgi complex component 7 (COG7)	https://tritrypdb.org/tritrypdb/app/record/gene/TRSC58_04931
TRSC58_05023	hypothetical protein	No data available	https://tritrypdb.org/tritrypdb/app/record/gene/TRSC58_05023
TRSC58_05040	hypothetical protein	No data available	https://tritrypdb.org/tritrypdb/app/record/gene/TRSC58_05040
TRSC58_05076	hypothetical protein	No data available	https://tritrypdb.org/tritrypdb/app/record/gene/TRSC58_05076
TRSC58_05094	hypothetical protein	No data available	https://tritrypdb.org/tritrypdb/app/record/gene/TRSC58_05094
TRSC58_05097	hypothetical protein	No data available	https://tritrypdb.org/tritrypdb/app/record/gene/TRSC58_05097
TRSC58_05157	hypothetical protein	SUPERFAMILY: DNase I-like	https://tritrypdb.org/tritrypdb/app/record/gene/TRSC58_05157
TRSC58_05509	hypothetical protein	PFAM: Hsp70 protein, SUPEFAMILY: Actin-like ATPase domain, Heat shock protein 70kD (HSP70), peptide-binding domain, Heat shock protein 70kD (HSP70), C-terminal subdomain, SUPERFAMILY: Actin-like ATPase domain, Heat shock protein 70kD (HSP70), C-terminal subdomain	https://tritrypdb.org/tritrypdb/app/record/gene/TRSC58_05509
TRSC58_05639	hypothetical protein	No data available	https://tritrypdb.org/tritrypdb/app/record/gene/TRSC58_05639
TRSC58_05704	hypothetical protein	PFAM: Histidine kinase-, DNA gyrase B-, and HSP90-like ATPase, PROSITEPROFILES: Histidine kinase domain profile, SUPERFAMILY: ATPase domain of HSP90 chaperone/DNA topoisomerase II/histidine kinase	https://tritrypdb.org/tritrypdb/app/record/gene/TRSC58_05704
TRSC58_05749	hypothetical protein	PFAM: Lysine methyltransferase, SUPERFAMILY: S-adenosyl-L-methionine-dependent methyltransferases	https://tritrypdb.org/tritrypdb/app/record/gene/TRSC58_05749
TRSC58_05824	hypothetical protein	No data available	https://tritrypdb.org/tritrypdb/app/record/gene/TRSC58_05824
TRSC58_05909	hypothetical protein	PFAM: NLI interacting factor-like phosphatase, PROSITEPROFILES: FCP1 homology domain profile, SUPERFAMILY: HAD-like	https://tritrypdb.org/tritrypdb/app/record/gene/TRSC58_05909
TRSC58_05976	hypothetical protein	SUPERFAMILY: Nudix	https://tritrypdb.org/tritrypdb/app/record/gene/TRSC58_05976
TRSC58_05994	hypothetical protein	No data available	https://tritrypdb.org/tritrypdb/app/record/gene/TRSC58_05994
TRSC58_06007	hypothetical protein	No data available	https://tritrypdb.org/tritrypdb/app/record/gene/TRSC58_06007
TRSC58_06019	hypothetical protein	No data available	https://tritrypdb.org/tritrypdb/app/record/gene/TRSC58_06019
TRSC58_06200	hypothetical protein	No data available	https://tritrypdb.org/tritrypdb/app/record/gene/TRSC58_06200
TRSC58_06232	hypothetical protein	No data available	https://tritrypdb.org/tritrypdb/app/record/gene/TRSC58_06232
TRSC58_06272	hypothetical protein	No data available	https://tritrypdb.org/tritrypdb/app/record/gene/TRSC58_06272
TRSC58_06305	hypothetical protein	PFAM: Leucine Rich repeats (2 copies), Leucine-rich repeat, PROSITEPROFILES: Leucine-rich repeat profile, SUPERFAMILY: Outer arm dynein light chain 1	https://tritrypdb.org/tritrypdb/app/record/gene/TRSC58_06305
TRSC58_06545	hypothetical protein	No data available	https://tritrypdb.org/tritrypdb/app/record/gene/TRSC58_06545
TRSC58_06556	hypothetical protein	No data available	https://tritrypdb.org/tritrypdb/app/record/gene/TRSC58_06556
TRSC58_06631	hypothetical protein	No data available	https://tritrypdb.org/tritrypdb/app/record/gene/TRSC58_06631
TRSC58_06649	hypothetical protein	No data available	https://tritrypdb.org/tritrypdb/app/record/gene/TRSC58_06649
TRSC58_06731	hypothetical protein	PFAM: SH3 domain, PROSITEPROFILES: Src homology 3 (SH3) domain profile, SUPERFAMILY: SH3-domain	https://tritrypdb.org/tritrypdb/app/record/gene/TRSC58_06731
TRSC58_06839	hypothetical protein	PFAM: AAA domain (dynein-related subfamily), PROSITEPROFILES, VWFA domain profile, SUPERFAMILY: P-loop containing nucleoside triphosphate hydrolases, vWA-like	https://tritrypdb.org/tritrypdb/app/record/gene/TRSC58_06839
TRSC58_06863	hypothetical protein	PROSITEPROFILES: EGF-like domain profile	https://tritrypdb.org/tritrypdb/app/record/gene/TRSC58_06863
TRSC58_06896	hypothetical protein	PFAM: zf-MYND, PROSITEPROFILES: Zinc finger MYND-type profile, SUPERFAMILY: HIT/MYND zinc finger-like	https://tritrypdb.org/tritrypdb/app/record/gene/TRSC58_06896
TRSC58_06966	hypothetical protein	No data available	https://tritrypdb.org/tritrypdb/app/record/gene/TRSC58_06966
TRSC58_07075	hypothetical protein	No data available	https://tritrypdb.org/tritrypdb/app/record/gene/TRSC58_07075
TRSC58_07137	hypothetical protein	No data available	https://tritrypdb.org/tritrypdb/app/record/gene/TRSC58_07137
TRSC58_07155	hypothetical protein	SUPERFAMILY: Protein kinase-like (PK-like)	https://tritrypdb.org/tritrypdb/app/record/gene/TRSC58_07155
TRSC58_07158	hypothetical protein	SUPERFAMILY: Periplasmic binding protein-like I	https://tritrypdb.org/tritrypdb/app/record/gene/TRSC58_07158
TRSC58_07188	hypothetical protein	PFAM: IGP family C-type lectin domain	https://tritrypdb.org/tritrypdb/app/record/gene/TRSC58_07188
TRSC58_07196	hypothetical protein	No data available	https://tritrypdb.org/tritrypdb/app/record/gene/TRSC58_07196
TRSC58_07217	hypothetical protein	PFAM: RasGEF domain, PROSITEPROFILES: Ras guanine-nucleotide exchange factors N-terminal domain profile, Ras guanine-nucleotide exchange factors catalytic domain profile, SUPERFAMILY: Ras GEF	https://tritrypdb.org/tritrypdb/app/record/gene/TRSC58_07217
TRSC58_07244	hypothetical protein	No data available	https://tritrypdb.org/tritrypdb/app/record/gene/TRSC58_07244
TRSC58_07253	hypothetical protein	No data available	https://tritrypdb.org/tritrypdb/app/record/gene/TRSC58_07253
TRSC58_07273	hypothetical protein	No data available	https://tritrypdb.org/tritrypdb/app/record/gene/TRSC58_07273
TRSC58_07277	hypothetical protein	No data available	https://tritrypdb.org/tritrypdb/app/record/gene/TRSC58_07277
TRSC58_07317	hypothetical protein	No data available	https://tritrypdb.org/tritrypdb/app/record/gene/TRSC58_07317
TRSC58_07376	hypothetical protein	No data available	https://tritrypdb.org/tritrypdb/app/record/gene/TRSC58_07376
TRSC58_07389	hypothetical protein	No data available	https://tritrypdb.org/tritrypdb/app/record/gene/TRSC58_07389
TRSC58_07446	hypothetical protein	No data available	https://tritrypdb.org/tritrypdb/app/record/gene/TRSC58_07446
TRSC58_07448	hypothetical protein	No data available	https://tritrypdb.org/tritrypdb/app/record/gene/TRSC58_07448
TRSC58_07587	hypothetical protein	No data available	https://tritrypdb.org/tritrypdb/app/record/gene/TRSC58_07587
TRSC58_07620	hypothetical protein	No data available	https://tritrypdb.org/tritrypdb/app/record/gene/TRSC58_07620
TRSC58_07640	hypothetical protein	No data available	https://tritrypdb.org/tritrypdb/app/record/gene/TRSC58_07640
TRSC58_07692	hypothetical protein	No data available	https://tritrypdb.org/tritrypdb/app/record/gene/TRSC58_07692
TRSC58_00107	hypothetical protein	No data available	https://tritrypdb.org/tritrypdb/app/record/gene/TRSC58_00107
TRSC58_00187	hypothetical protein	SUPERFAMILY: WD40 repeat-like	https://tritrypdb.org/tritrypdb/app/record/gene/TRSC58_00187
TRSC58_00205	hypothetical protein	SUPERFAMILY: TPR-like	https://tritrypdb.org/tritrypdb/app/record/gene/TRSC58_00205
TRSC58_00224	hypothetical protein	No data available	https://tritrypdb.org/tritrypdb/app/record/gene/TRSC58_00224
TRSC58_00275	hypothetical protein	No data available	https://tritrypdb.org/tritrypdb/app/record/gene/TRSC58_00275
TRSC58_00292	hypothetical protein	No data available	https://tritrypdb.org/tritrypdb/app/record/gene/TRSC58_00292
TRSC58_00317	hypothetical protein	PFAM: SAP domain, PROSITEPROFILES: SAP motif profile, SUPERFAMILY: SAP domain	https://tritrypdb.org/tritrypdb/app/record/gene/TRSC58_00317
TRSC58_00381	hypothetical protein	No data available	https://tritrypdb.org/tritrypdb/app/record/gene/TRSC58_00381
TRSC58_00404	hypothetical protein	No data available	https://tritrypdb.org/tritrypdb/app/record/gene/TRSC58_00404
TRSC58_00436	hypothetical protein	No data available	https://tritrypdb.org/tritrypdb/app/record/gene/TRSC58_00436
TRSC58_00523	hypothetical protein	SUPERFAMILY: TPR-like	https://tritrypdb.org/tritrypdb/app/record/gene/TRSC58_00523
TRSC58_00562	hypothetical protein	PROSITEPROFILES: Ubiquitin domain profile, SUPERFAMILY: Ubiquitin-like	https://tritrypdb.org/tritrypdb/app/record/gene/TRSC58_00562
TRSC58_00588	hypothetical protein	PFAM: Transport protein Trs120 or TRAPPC9, TRAPP II complex subunit	https://tritrypdb.org/tritrypdb/app/record/gene/TRSC58_00588
TRSC58_00592	hypothetical protein	No data available	https://tritrypdb.org/tritrypdb/app/record/gene/TRSC58_00592
TRSC58_00646	hypothetical protein	PFAM: Glucosidase II beta subunit-like protein	https://tritrypdb.org/tritrypdb/app/record/gene/TRSC58_00646
TRSC58_00656	hypothetical protein	No data available	https://tritrypdb.org/tritrypdb/app/record/gene/TRSC58_00656
TRSC58_00681	hypothetical protein	PFAM: DnaJ domain, PROSITEPROFILES: dnaJ domain profile, SUPERFAMILY: Chaperone J-domain	https://tritrypdb.org/tritrypdb/app/record/gene/TRSC58_00681
TRSC58_00706	hypothetical protein	PROSITEPROFILES: Tripartite DENN domain profile	https://tritrypdb.org/tritrypdb/app/record/gene/TRSC58_00706
TRSC58_00712	hypothetical protein	No data available	https://tritrypdb.org/tritrypdb/app/record/gene/TRSC58_00712
TRSC58_00773	hypothetical protein	PFAM: PSP1 C-terminal conserved region, PROSITEPROFILES: PSP1 C-terminal domain profile	https://tritrypdb.org/tritrypdb/app/record/gene/TRSC58_00773
TRSC58_00855	hypothetical protein	No data available	https://tritrypdb.org/tritrypdb/app/record/gene/TRSC58_00855
TRSC58_00860	hypothetical protein	No data available	https://tritrypdb.org/tritrypdb/app/record/gene/TRSC58_00860
TRSC58_00908	hypothetical protein	No data available	https://tritrypdb.org/tritrypdb/app/record/gene/TRSC58_00908
TRSC58_00939	hypothetical protein	No data available	https://tritrypdb.org/tritrypdb/app/record/gene/TRSC58_00939
TRSC58_01011	hypothetical protein	No data available	https://tritrypdb.org/tritrypdb/app/record/gene/TRSC58_01011
TRSC58_01021	hypothetical protein	SUPERFAMILY: RING/U-box	https://tritrypdb.org/tritrypdb/app/record/gene/TRSC58_01021
TRSC58_01258	hypothetical protein	No data available	https://tritrypdb.org/tritrypdb/app/record/gene/TRSC58_01258
TRSC58_01328	hypothetical protein	No data available	https://tritrypdb.org/tritrypdb/app/record/gene/TRSC58_01328
TRSC58_01374	hypothetical protein	No data available	https://tritrypdb.org/tritrypdb/app/record/gene/TRSC58_01374
TRSC58_01401	hypothetical protein	PFAM: Kringle domain, Chitobiase/beta-hexosaminidase C-terminal domain, PROSITEPROFILES: Kringle domain profile, SUPERFAMILY: Kringle-like	https://tritrypdb.org/tritrypdb/app/record/gene/TRSC58_01401
TRSC58_01453	hypothetical protein	No data available	https://tritrypdb.org/tritrypdb/app/record/gene/TRSC58_01453
TRSC58_01490	hypothetical protein	PROSITEPROFILES: Zinc finger RING-type profile, SUPERFAMILY: RING/U-box	https://tritrypdb.org/tritrypdb/app/record/gene/TRSC58_01490
TRSC58_01501	hypothetical protein	No data available	https://tritrypdb.org/tritrypdb/app/record/gene/TRSC58_01501
TRSC58_01533	hypothetical protein	PFAM: N-acetyltransferase B complex (NatB) non catalytic subunit, SUPERFAMILY: TPR-like	https://tritrypdb.org/tritrypdb/app/record/gene/TRSC58_01533
TRSC58_01549	hypothetical protein	PFAM: NAD(P)-binding Rossmann-like domain, SUPERFAMILY: FAD/NAD(P)-binding domain	https://tritrypdb.org/tritrypdb/app/record/gene/TRSC58_01549
TRSC58_01576	hypothetical protein	PFAM: Pentatricopeptide repeat domain, PROSITEPROFILES: Pentatricopeptide (PPR) repeat profile	https://tritrypdb.org/tritrypdb/app/record/gene/TRSC58_01576
TRSC58_01578	hypothetical protein	No data available	https://tritrypdb.org/tritrypdb/app/record/gene/TRSC58_01578
TRSC58_01592	hypothetical protein	SUPERFAMILY: NAD kinase/diacylglycerol kinase-like	https://tritrypdb.org/tritrypdb/app/record/gene/TRSC58_01592
TRSC58_01595	hypothetical protein	No data available	https://tritrypdb.org/tritrypdb/app/record/gene/TRSC58_01595
TRSC58_01659	hypothetical protein	No data available	https://tritrypdb.org/tritrypdb/app/record/gene/TRSC58_01659
TRSC58_01677	hypothetical protein	SUPERFAMILY: ARM repeat	https://tritrypdb.org/tritrypdb/app/record/gene/TRSC58_01677
TRSC58_01729	hypothetical protein	PFAM: Aminomethyltransferase folate-binding domain, Glycine cleavage T-protein C-terminal barrel domain, SUPERFAMILY: Folate-binding domain, TIGRFAM: ygfZ_signature: folate-binding protein YgfZ	https://tritrypdb.org/tritrypdb/app/record/gene/TRSC58_01729
TRSC58_02010	hypothetical protein	PROSITEPROFILES: Prokaryotic membrane lipoprotein lipid attachment site profile	https://tritrypdb.org/tritrypdb/app/record/gene/TRSC58_02010
TRSC58_02069	hypothetical protein	PFAM: Phosphoenolpyruvate carboxykinase, SUPERFAMILY: PEP carboxykinase-like	https://tritrypdb.org/tritrypdb/app/record/gene/TRSC58_02069
TRSC58_02248	hypothetical protein	PFAM: Domain of unknown function (DUF1771), Smr domain, PROSITEPROFILES: Ubiquitin-associated domain (UBA) profile, Zinc finger C3H1-type profile, CUE domain profile, Smr domain profile, SUPERFAMILY: UBA-like, SMR domain-like	https://tritrypdb.org/tritrypdb/app/record/gene/TRSC58_02248
TRSC58_02341	hypothetical protein	SUPERFAMILY: P-loop containing nucleoside triphosphate hydrolases	https://tritrypdb.org/tritrypdb/app/record/gene/TRSC58_02341
TRSC58_02448	hypothetical protein	No data available	https://tritrypdb.org/tritrypdb/app/record/gene/TRSC58_02448
TRSC58_02465	hypothetical protein	PFAM: Iron-sulphur cluster biosynthesis, SUPERFAMILY: HesB-like domain, TIGRFAM: TIGR00049: iron-sulfur cluster assembly accessory protein	https://tritrypdb.org/tritrypdb/app/record/gene/TRSC58_02465
TRSC58_02501	hypothetical protein	No data available	https://tritrypdb.org/tritrypdb/app/record/gene/TRSC58_02501
TRSC58_02506	hypothetical protein	PFAM: Phosphoenolpyruvate carboxykinase, SUPERFAMILY: PEP carboxykinase-like	https://tritrypdb.org/tritrypdb/app/record/gene/TRSC58_02506
TRSC58_02549	hypothetical protein	PFAM: Rab-GTPase-TBC domain, PROSITEPROFILES: TBC/rab GAP domain profile, SUPERFAMILY: Ypt/Rab-GAP domain of gyp1p	https://tritrypdb.org/tritrypdb/app/record/gene/TRSC58_02549
TRSC58_02644	hypothetical protein	PFAM: Pyridine nucleotide-disulphide oxidoreductase, PROSITEPROFILES: Prokaryotic membrane lipoprotein lipid attachment site profile, SUPERFAMILY: FAD/NAD(P)-binding domain	https://tritrypdb.org/tritrypdb/app/record/gene/TRSC58_02644
TRSC58_02647	hypothetical protein	No data available	https://tritrypdb.org/tritrypdb/app/record/gene/TRSC58_02647
TRSC58_02704	hypothetical protein	No data available	https://tritrypdb.org/tritrypdb/app/record/gene/TRSC58_02704
TRSC58_02784	hypothetical protein	PFAM: Flavin-binding monooxygenase-like, SUPERFAMILY: FAD/NAD(P)-binding domain, NAD(P)-binding Rossmann-fold domains,	https://tritrypdb.org/tritrypdb/app/record/gene/TRSC58_02784
TRSC58_02819	hypothetical protein	No data available	https://tritrypdb.org/tritrypdb/app/record/gene/TRSC58_02819
TRSC58_02840	hypothetical protein	No data available	https://tritrypdb.org/tritrypdb/app/record/gene/TRSC58_02840
TRSC58_02855	hypothetical protein	No data available	https://tritrypdb.org/tritrypdb/app/record/gene/TRSC58_02855
TRSC58_03082	hypothetical protein	No data available	https://tritrypdb.org/tritrypdb/app/record/gene/TRSC58_03082
TRSC58_03097	hypothetical protein	No data available	https://tritrypdb.org/tritrypdb/app/record/gene/TRSC58_03097
TRSC58_03122	hypothetical protein	PFAM: Protein of unknown function (DUF563)	https://tritrypdb.org/tritrypdb/app/record/gene/TRSC58_03122
TRSC58_03267	hypothetical protein	No data available	https://tritrypdb.org/tritrypdb/app/record/gene/TRSC58_03267
TRSC58_03295	hypothetical protein	No data available	https://tritrypdb.org/tritrypdb/app/record/gene/TRSC58_03295
TRSC58_03478	hypothetical protein	No data available	https://tritrypdb.org/tritrypdb/app/record/gene/TRSC58_03478
TRSC58_03517	hypothetical protein	No data available	https://tritrypdb.org/tritrypdb/app/record/gene/TRSC58_03517
TRSC58_03536	hypothetical protein	SUPERFAMILY: HMG-box	https://tritrypdb.org/tritrypdb/app/record/gene/TRSC58_03536
TRSC58_07705	hypothetical protein	No data available	https://tritrypdb.org/tritrypdb/app/record/gene/TRSC58_07705
Heat Shock Proteins and Chaperones
Trypanosoma rangeli
TRSC58_03733	glucose-regulated protein 78	PFAM: Hsp70 protein, SUPEFAMILY: Actin-like ATPase domain, Heat shock protein 70kD (HSP70), peptide-binding domain, Heat shock protein 70kD (HSP70), C-terminal subdomain	https://tritrypdb.org/tritrypdb/app/record/gene/TRSC58_03733
TRSC58_01986	heat shock protein HslVU, ATPase subunit HslU	PFAM: AAA domain (Cdc48 subfamily), C-terminal, D2-small domain, of ClpB protein, SUPERFAMILY: P-loop containing nucleoside triphosphate hydrolases, hslU: ATP-dependent protease HslVU, ATPase subunit	https://tritrypdb.org/tritrypdb/app/record/gene/TRSC58_01986
TRSC58_04483	heat shock protein HslVU, ATPase subunit HslU	PFAM: ATPase family associated with various cellular activities (AAA), AAA domain (Cdc48 subfamily), SUPERFAMILY: P-loop containing nucleoside triphosphate hydrolases, TIGRFAM: hslU: ATP-dependent protease HslVU, ATPase subunit	https://tritrypdb.org/tritrypdb/app/record/gene/TRSC58_04483
TRSC58_04946	NAD-dependent deacetylase 3.5.1.-	PFAM: Sir2 family, PROSITEPROFILES: Sirtuin catalytic domain profile, SUPERFAMILY: DHS-like NAD/FAD-binding domain	https://tritrypdb.org/tritrypdb/app/record/gene/TRSC58_04946
TRSC58_00163	peptide chain release factor 1	PFAM: PCRF domain, RF-1 domain, SUPERFAMILY: Release factor	https://tritrypdb.org/tritrypdb/app/record/gene/TRSC58_00163
TRSC58_01562	iron-sulfur cluster assembly protein	PFAM: NifU-like N terminal domain, SUPERFAMILY: SufE/NifU	https://tritrypdb.org/tritrypdb/app/record/gene/TRSC58_01562
TRSC58_06002	ubiquitin-activating enzyme	PFAM: ThiF family, SUPERFAMILY: Activating enzymes of the ubiquitin-like proteins	https://tritrypdb.org/tritrypdb/app/record/gene/TRSC58_06002
TRSC58_01704	ubiquitin-like protein	PFAM: Ubiquitin family, UBA/TS-N domain, PROSITEPROFILES: Ubiquitin domain profile, Ubiquitin-associated domain (UBA) profile, SUPERFAMILY: Ubiquitin-like, UBA-like	https://tritrypdb.org/tritrypdb/app/record/gene/TRSC58_01704
TRSC58_01265	vesicular-fusion ATPase-like protein	PFAM: ATPase family associated with various cellular activities (AAA), SUPERFAMILY: P-loop containing nucleoside triphosphate hydrolases	https://tritrypdb.org/tritrypdb/app/record/gene/TRSC58_01265
Signaling
Trypanosoma rangeli
TRSC58_01821	glycogen synthase kinase-3 alpha	PFAM: Protein kinase domain, PROSITEPROFILES: Protein kinase domain profile, SUPERFAMILY: Protein kinase-like (PK-like)	https://tritrypdb.org/tritrypdb/app/record/gene/TRSC58_01821
TRSC58_04578	ran-binding protein 1	PFAM: RanBP1 domain, PROSITEPROFILES: Ran binding domain type 1 profile, SUPERFAMILY: PH domain-like	https://tritrypdb.org/tritrypdb/app/record/gene/TRSC58_04578
TRSC58_06433	4-nitrophenyl phosphatase 3.1.3.41	PFAM: H;aloacid dehalogenase-like hydrolase, HAD-hyrolase-like, SUPERFAMILY: HAD-like	https://tritrypdb.org/tritrypdb/app/record/gene/TRSC58_06433
	P-nitrophenylphosphatase	PFAM: Haloacid dehalogenase-like hydrolase, HAD-hyrolase-like, SUPERFAMILY: HAD-like	https://tritrypdb.org/tritrypdb/app/record/gene/TRSC58_05352
TRSC58_04570	protein kinase	PFAM: Protein kinase domain, PROSITEPROFILES: Protein kinase domain profile, SUPERFAMILY: Protein kinase-like (PK-like)	https://tritrypdb.org/tritrypdb/app/record/gene/TRSC58_04570
TRSC58_01238	serine/threonine protein phosphatase	PFAM: Calcineurin-like phosphoesterase, SUPERFAMILY: Metallo-dependent phosphatases,	https://tritrypdb.org/tritrypdb/app/record/gene/TRSC58_01238
Transcription an protein synthesis
Trypanosoma rangeli
TRSC58_00604	arginyl-tRNA synthetase 6.1.1.19	PFAM: Arginyl tRNA synthetase N terminal domain, tRNA synthetases class I (R), DALR anticodon binding domain,SUPERFAMILY: Arginyl-tRNA synthetase (ArgRS), N-terminal 'additional' domain superfamily, Nucleotidylyl transferase, Anticodon-binding domain of a subclass of class I aminoacyl-tRNA synthetases	https://tritrypdb.org/tritrypdb/app/record/gene/TRSC58_00604
TRSC58_05580	elongation factor 1-alpha	PFAM: Elongation factor Tu GTP binding domain, Elongation factor Tu domain 2, Elongation factor Tu C-terminal domain, PROSITEPROFILES: Translational (tr)-type guanine nucleotide-binding (G) domain profile, SUPERFAMILY: P-loop containing nucleoside triphosphate hydrolases, Translation proteins, EF-Tu/eEF-1alpha/eIF2-gamma C-terminal domain, TIGRFAM: EF-1_alpha: translation elongation factor EF-1, …	https://tritrypdb.org/tritrypdb/app/record/gene/TRSC58_05580
TRSC58_00967	RNA editing complex protein MP46	No data available	https://tritrypdb.org/tritrypdb/app/record/gene/TRSC58_00967
TRSC58_05826	RNA editing complex protein MP61	PROSITEPROFILES: Ribonuclease III family domain profile, SUPERFAMILY: RNase III domain-like	https://tritrypdb.org/tritrypdb/app/record/gene/TRSC58_05826
		Proteolysis
TRSC58_05082	imidazolonepropionase	PFAM: Amidohydrolase family, SUPERFAMILY: Composite domain of metallo-dependent hydrolases, Metallo-dependent hydrolases, TIGRFAM: hutI: imidazolonepropionase	https://tritrypdb.org/tritrypdb/app/record/gene/TRSC58_05082
TRSC58_04547	pitrilysin-like metalloprotease	PFAM: Insulinase (Peptidase family M16), Peptidase M16 inactive domain, Peptidase M16C associated, SUPERFAMILY: LuxS/MPP-like metallohydrolase	https://tritrypdb.org/tritrypdb/app/record/gene/TRSC58_04547
Carbohydrate metabolism
Trypanosoma rangeli
TRSC58_00830	dihydrolipoamide acetyltransferase 2.3.1.12	PFAM: Biotin-requiring enzyme, PROSITEPROFILES: Biotinyl/lipoyl domain profile, SUPERFAMILY: Single hybrid motif	https://tritrypdb.org/tritrypdb/app/record/gene/TRSC58_00830
TRSC58_06876	aldose 1-epimerase 5.1.3.3	PFAM: Aldose 1-epimerase, SUPEFAMILY: Galactose mutarotase-like	https://tritrypdb.org/tritrypdb/app/record/gene/TRSC58_06876
TRSC58_00429	legume-like lectin	PFAM: Legume-like lectin family, PROSITEPROFILES: L-type lectin-like (leguminous) domain profile, SUPERFAMILY: Concanavalin A-like lectins/glucanases	https://tritrypdb.org/tritrypdb/app/record/gene/TRSC58_00429
TRSC58_05294	ubiquinone biosynthesis protein-like protein	PFAM: Coenzyme Q (ubiquinone) biosynthesis protein Coq4	https://tritrypdb.org/tritrypdb/app/record/gene/TRSC58_05294
Oxydo-Reduction
Trypanosoma rangeli
TRSC58_05738	alcohol dehydrogenase	PFAM: Iron-containing alcohol dehydrogenase, SUPERFAMILY: Dehydroquinate synthase-like	https://tritrypdb.org/tritrypdb/app/record/gene/TRSC58_05738
TRSC58_01421	cytochrome c oxidase assembly factor	PFAM: SCO1/SenC, SUPERFAMILY: Thioredoxin-like	https://tritrypdb.org/tritrypdb/app/record/gene/TRSC58_01421
TRSC58_00139	cytochrome-B5 reductase	PFAM: Oxidoreductase FAD-binding domain, Oxidoreductase NAD-binding domain, PROSITEPROFILES: Ferredoxin reductase-type FAD binding domain profile, SUPERFAMILY: Riboflavin synthase domain-like, Ferredoxin reductase-like, C-terminal NADP-linked domain	https://tritrypdb.org/tritrypdb/app/record/gene/TRSC58_00139
TRSC58_06976	glutathione peroxidase-type tryparedoxin peroxidase 1.11.1.-	PFAM: Glutathione peroxidase, PIRSF: Glutathione peroxidase, PROSITEPROFILES: Glutathione peroxidase profile, SUPERFAMILY: Thioredoxin-like	https://tritrypdb.org/tritrypdb/app/record/gene/TRSC58_06976
TRSC58_03053	reductase	PFAM: Oxidoreductase FAD-binding domain, Oxidoreductase NAD-binding domain, PROSITEPROFILES: Ferredoxin reductase-type FAD binding domain profile, SUPERFAMILY: Riboflavin synthase domain-like, Ferredoxin reductase-like, C-terminal NADP-linked domain	https://tritrypdb.org/tritrypdb/app/record/gene/TRSC58_03053
Trafficking and membrane fusion
Trypanosoma rangeli
TRSC58_02804	vacuolar protein sorting-associated protein	PFAM: Vacuolar protein sorting-associated protein 26	https://tritrypdb.org/tritrypdb/app/record/gene/TRSC58_02804
TRSC58_04673	ADP-ribosylation factor family	PFAM: ADP-ribosylation factor family, PROSITEPROFILES: small GTPase Arf family profile, SUPERFAMILY: P-loop containing nucleoside triphosphate hydrolases, TIGRFAM: small_GTP small GTP-binding protein domain	https://tritrypdb.org/tritrypdb/app/record/gene/TRSC58_04673
TRSC58_06205	exportin 1	PFAM: Importin-beta N-terminal domain, Exportin 1-like protein, CRM1 C terminal, PROSITEPROFILES: Importin-beta N-terminal domain profile, SUPERFAMILY: ARM repeat	https://tritrypdb.org/tritrypdb/app/record/gene/TRSC58_06205
Protein and Amino Acid metabolism
Trypanosoma rangeli
TRSC58_00066	pseudouridylate synthase I 4.2.1.70	PFAM: tRNA pseudouridine synthase, SUPERFAMILY: Pseudouridine synthase	https://tritrypdb.org/tritrypdb/app/record/gene/TRSC58_00066
TRSC58_02926	cyclophilin	PFAM: Cyclophilin type peptidyl-prolyl cis-trans isomerase/CLD, PIRSF: Peptidyl-prolyl cis-trans isomerase, PROSITEPROFILES: Prokaryotic membrane lipoprotein lipid attachment site profile, Cyclophilin-type peptidyl-prolyl cis-trans isomerase domain profile, SUPERFAMILY: Cyclophilin-like	https://tritrypdb.org/tritrypdb/app/record/gene/TRSC58_02926
TRSC58_01079	cyclophilin 5.2.1.8	PFAM: Cyclophilin type peptidyl-prolyl cis-trans isomerase/CLD, PIRSF: Peptidyl-prolyl cis-trans isomerase, PROSITEPROFILES: Cyclophilin-type peptidyl-prolyl cis-trans isomerase domain profile, SUPERFAMILY: Cyclophilin-like	https://tritrypdb.org/tritrypdb/app/record/gene/TRSC58_01079
Cell Structure and Motility
Trypanosoma rangeli
TRSC58_03348	centrin	PFAM: EF-hand domain pair, PROSITEPROFILES: EF-hand calcium-binding domain profile, SUPERFAMILY: EF-hand	https://tritrypdb.org/tritrypdb/app/record/gene/TRSC58_03348
TRSC58_04099	translation initiation factor IF-2	PFAM: Elongation factor Tu GTP binding domain, Translation-initiation factor 2, PROSITEPROFILES: Translational (tr)-type guanine nucleotide-binding (G) domain profile, SUPERFAMILY: P-loop containing nucleoside triphosphate hydrolases, Translation proteins, Initiation factor IF2/eIF5b, domain 3, TIGRFAM: small_GTP: small GTP-binding protein domain	https://tritrypdb.org/tritrypdb/app/record/gene/TRSC58_04099
TRSC58_05766	translation initiation factor IF-2	PFAM: Elongation factor Tu GTP binding domain, PROSITEPROFILES: Translational (tr)-type guanine nucleotide-binding (G) domain profile, SUPERFAMILY: P-loop containing nucleoside triphosphate hydrolases, TIGRFAM: small_GTP: small GTP-binding protein domain	https://tritrypdb.org/tritrypdb/app/record/gene/TRSC58_05766
Nucleic acids binding
Trypanosoma rangeli
TRSC58_04424	arginine N-methyltransferase	SUPERFAMILY: S-adenosyl-L-methionine-dependent methyltransferases	https://tritrypdb.org/tritrypdb/app/record/gene/TRSC58_04424
TRSC58_00169	ATP-dependent DEAD/H RNA helicase	PFAM: DEAD/DEAH box helicase, Helicase conserved C-terminal domain,PROSITEPROFILES: Superfamilies 1 and 2 helicase ATP-binding type-1 domain profile, Superfamilies 1 and 2 helicase C-terminal domain profile, SUPERFAMILY: P-loop containing nucleoside triphosphate hydrolases	https://tritrypdb.org/tritrypdb/app/record/gene/TRSC58_00169
TRSC58_00643	ATP-dependent DEAD/H RNA helicase	PFAM: DEAD/DEAH box helicase, Helicase conserved C-terminal domain, PROSITEPROFILES: DEAD-box RNA helicase Q motif profile, Superfamilies 1 and 2 helicase ATP-binding type-1 domain profile, Superfamilies 1 and 2 helicase C-terminal domain profile, SUPERFAMILY: P-loop containing nucleoside triphosphate hydrolases superfamily	https://tritrypdb.org/tritrypdb/app/record/gene/TRSC58_00643
TRSC58_01559	basic transcription factor 3a	PFAM: NAC domain, PROSITEPROFILES: NAC A/B domain profile	https://tritrypdb.org/tritrypdb/app/record/gene/TRSC58_01559
TRSC58_00632	DNA ligase 6.5.1.1	SUPERFAMILY: DNA ligase/mRNA capping enzyme, catalytic domain	https://tritrypdb.org/tritrypdb/app/record/gene/TRSC58_00632
TRSC58_04338	DNA ligase 6.5.1.1	PFAM: Probable Zinc-ribbon domain, ATP dependent DNA ligase domain, DNA ligase OB-like domain, PROSITEPROFILES: ATP-dependent DNA ligase family profile, SUPERFAMILY: DNA ligase/mRNA capping enzyme, catalytic domain, Nucleic acid-binding proteins	https://tritrypdb.org/tritrypdb/app/record/gene/TRSC58_04338
TRSC58_03251	DNA polymerase kappa 2.7.7.7	PFAM: impB/mucB/samB family, impB/mucB/samB family C-terminal domain, PROSITEPROFILES: UmuC domain profile, SUPERFAMILY: DNA/RNA polymerases, Lesion bypass DNA polymerase (Y-family), little finger domain	https://tritrypdb.org/tritrypdb/app/record/gene/TRSC58_03251
TRSC58_05954	DNA-directed RNA polymerase subunit 2.7.7.6	PFAM: RNA polymerase Rpb6, PIRSF: DNA-directed RNA polymerase, subunit K/RPB6 subunit, DNA-directed RNA polymerase, RPB6 type, SUPERFAMILY: RPB6/omega subunit-like	https://tritrypdb.org/tritrypdb/app/record/gene/TRSC58_05954
TRSC58_02723	histone H2A	No data available	https://tritrypdb.org/tritrypdb/app/record/gene/TRSC58_02723
TRSC58_03596	RNA-binding protein	PROSITEPROFILES: Eukaryotic RNA Recognition Motif (RRM) profile, SUPERFAMILY: RNA-binding domain, RBD	https://tritrypdb.org/tritrypdb/app/record/gene/TRSC58_03596
TRSC58_05515	RNA-binding protein	PFAM: RNA recognition motif. (a.k.a. RRM, RBD, or RNP domain), PROSITEPROFILES: Eukaryotic RNA Recognition Motif (RRM) profile, SUPERFAMILY: RNA-binding domain, RBD	https://tritrypdb.org/tritrypdb/app/record/gene/TRSC58_05515
TRSC58_02477	splicing factor 3B subunit 1	PFAM: Splicing factor 3B subunit 1, SUPERFAMILY: ARM repeat	https://tritrypdb.org/tritrypdb/app/record/gene/TRSC58_02477
Lipid metabolism
Trypanosoma rangeli
TRSC58_00884	C-8 sterol isomerase	PFAM: ERG2 and Sigma1 receptor like protein	https://tritrypdb.org/tritrypdb/app/record/gene/TRSC58_00884
TRSC58_05658	enoyl-CoA hydratase, mitochondrial precursor 4.2.1.17	PFAM: Enoyl-CoA hydratase/isomerase, SUPERFAMILY: ClpP/crotonase	https://tritrypdb.org/tritrypdb/app/record/gene/TRSC58_05658
TRSC58_01103	myo-inositol-1-phosphate synthase	PFAM: Myo-inositol-1-phosphate synthase, PIRSF: Myo-inositol-1-phosphate synthase, SUPERFAMILY: NAD(P)-binding Rossmann-fold domains, Glyceraldehyde-3-phosphate dehydrogenase-like, C-terminal domain	https://tritrypdb.org/tritrypdb/app/record/gene/TRSC58_01103
Transporters
Trypanosoma rangeli
TRSC58_01358	vacuolar ATP synthase subunit c 3.6.1.35	PFAM: V-ATPase subunit C, SUPERFAMILY: Vacuolar ATP synthase subunit C	https://tritrypdb.org/tritrypdb/app/record/gene/TRSC58_01358
TRSC58_02239	ABC transporter	PFAM: ABC transporter, PROSITEPROFILES: ATP-binding cassette, ABC transporter-type domain profile, SUPERFAMILY: P-loop containing nucleoside triphosphate hydrolases	https://tritrypdb.org/tritrypdb/app/record/gene/TRSC58_02239
TRSC58_02060	GMP synthase	PFAM: Glutamine amidotransferase class-I, NAD synthase, GMP synthase C terminal domain, GMP synthase C terminal domain, PROSITEPROFILES: Prokaryotic membrane lipoprotein lipid attachment site profile, Glutamine amidotransferase type 1 domain profile, GMP synthetase ATP pyrophosphatase (GMPS ATP-PPase) domain profile, SUPERFAMILY: Class I glutamine amidotransferase-like, Adenine nucleotide alpha h…	https://tritrypdb.org/tritrypdb/app/record/gene/TRSC58_02060
Other
Trypanosoma rangeli
TRSC58_05459	acid phosphatase	PFAM: Histidine phosphatase superfamily (branch 2), SUPERFAMILY: Phosphoglycerate mutase-like	https://tritrypdb.org/tritrypdb/app/record/gene/TRSC58_05459
TRSC58_05707	frataxin-like, mitochondrial precursor	PFAM: Frataxin-like domain, PROSITEPROFILES: Frataxin family profile, SUPERFAMILY: Frataxin/Nqo15-like, TIGRFAM: FeS_CyaY: iron donor protein CyaY, mito_frataxin: frataxin	https://tritrypdb.org/tritrypdb/app/record/gene/TRSC58_05707
TRSC58_03562	pterin-4-alpha-carbinolamine dehydratase	PFAM: Pterin 4 alpha carbinolamine dehydratase, SUPERFAMILY: PCD-like	https://tritrypdb.org/tritrypdb/app/record/gene/TRSC58_03562
TRSC58_05399	methyltransferase	PFAM: Putative RNA methylase family UPF0020, SUPERFAMILY: S-adenosyl-L-methionine-dependent methyltransferases	https://tritrypdb.org/tritrypdb/app/record/gene/TRSC58_05399
TRSC58_01481	methyltransferase	PFAM: FtsJ-like methyltransferase, PROSITEPROFILES: RrmJ-type ribose 2'-O-methyltransferase (EC 2.1.1.57) domain profile, SUPERFAMILY: S-adenosyl-L-methionine-dependent methyltransferases	https://tritrypdb.org/tritrypdb/app/record/gene/TRSC58_01481
TRSC58_00719	septum formation inhibitor, Maf-like protein	PFAM: Maf-like protein, SUPERFAMILY: ITPase-like, TIGRFAM: maf: septum formation protein Maf	https://tritrypdb.org/tritrypdb/app/record/gene/TRSC58_00719
